# Supplementary material for: IKKε-deficient macrophages impede cardiac repair after myocardial infarction by enhancing macrophage-myofibroblast transition
Source: Research Square preprint supplement (doi:10.21203/rs.3.rs-3899594/v1), 2024-03-01
Supplement: Supplementary file 1 [file 8342b612723bf658235efc9c.docx]

**Supplemental information**

**IKKε-deficient macrophages impede cardiac repair after myocardial infarction by enhancing macrophage-myofibroblast transition**

Running title: Macrophage-Myofibroblast Transition in Hearts

Hyang Hee Cho1†, Siyeon Rhee2†, Dong Im Cho1, Ju Hee Jun1, HyoJung Heo3, Su Han Cho4, Dohyup Kim5, Mingqiang Wang2, Bo Gyeong Kang1, Soo Ji Yoo1, Meeyoung Cho1, Soo yeon Lim1, Jae Yeong Cho6, In Seok Jeong7, Yong Sook Kim1,8*, Youngkeun Ahn1,6*

1Cell Regeneration Research Center, Chonnam National University Hospital, Gwangju, Republic of Korea.

2Stanford Cardiovascular Institute, Stanford University, Stanford, California, USA.

3Department of Molecular and Cell Biology, University of California, Berkeley, California, USA.

4Department of Biology, Kyung Hee University, Seoul, Republic of Korea

5Division of Asthma Research, Cincinnati Children's Hospital Medical Center, Cincinnati, Ohio, USA.

6Department of Cardiology, Chonnam National University Hospital and Medical School, Gwangju, Republic of Korea.

7Department of Thoracic and Cardiovascular surgery, Chonnam National University Hospital and Medical School, Gwangju, Republic of Korea

8Biomedical Research Institute, Chonnam National University Hospital, Gwangju, Republic of Korea.

† These authors contributed equally to this article.

*Address of Correspondence:

Youngkeun Ahn, Department of Cardiology, Chonnam National University Hospital and Medical School, Gwangju, 61469, Republic of Korea.

Tel: 82-62-220-6188, Email: cecilyk@hanmail.net

Yong Sook Kim, Biomedical Research Institute, Chonnam National University Hospital, Gwangju, 61469, Republic of Korea.,

Tel: 82-62-220-6941, Email: reorgan@hanmail.net

**
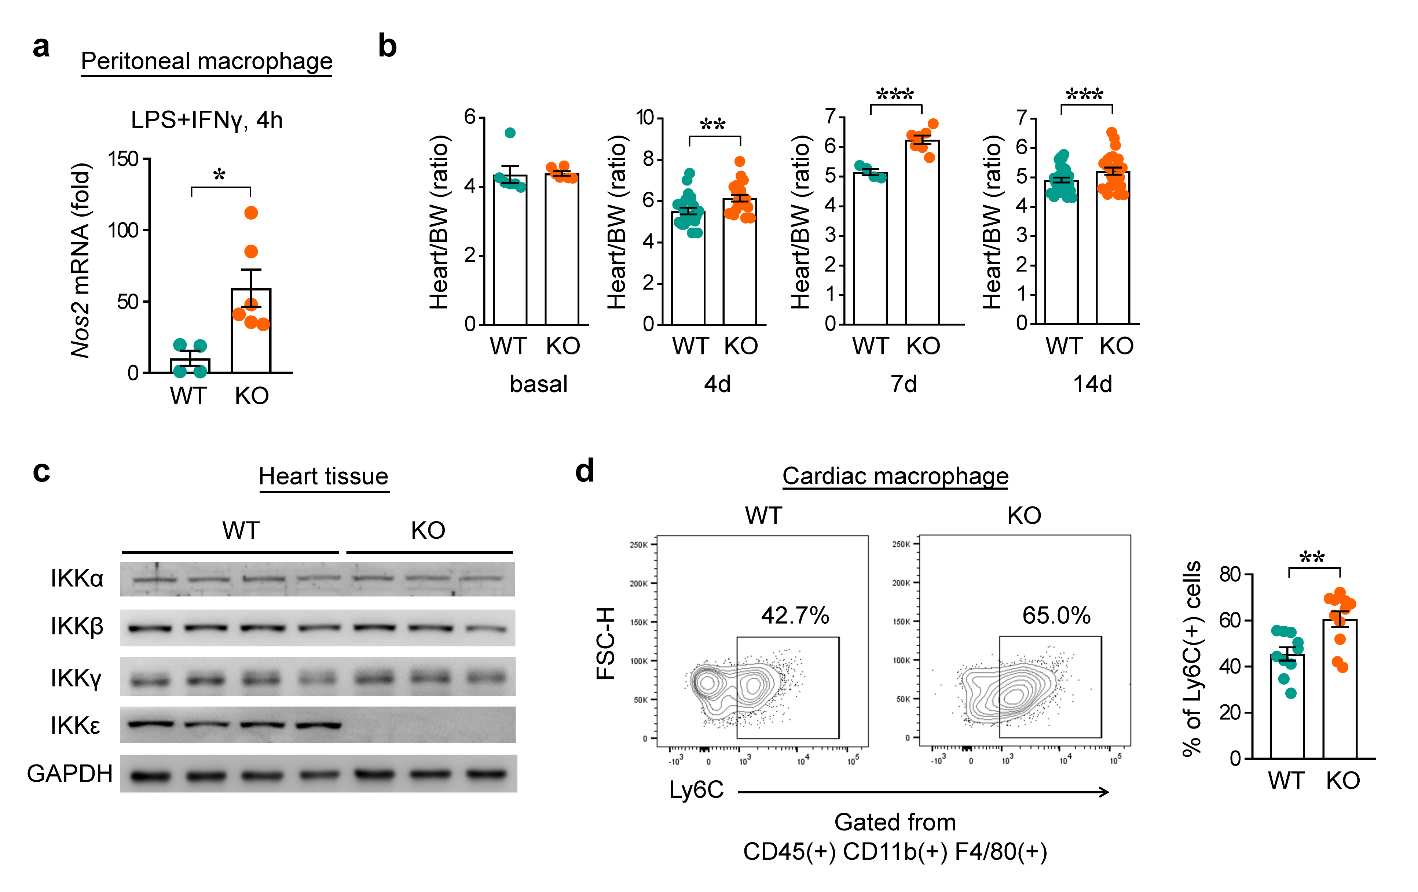
Supplementary Fig 1. IKKε deficiency is associated with enhanced cardiac damage after myocardial infarction. a** Peritoneal macrophages were isolated from a peritonitis model in wild type (WT) and IKKε knockout (KO) mice, and stimulated LPS (100 ng/mL) and IFNγ (30 ng/mL) for 4 hours. The iNOS mRNA level was assessed by real-time PCR. **b** Hearts were collected at day 0, 4, 7, and 14 after myocardial infarction (MI), and the ratio of heart to body weight was measured. **c** The protein levels of IKK subtypes were compared in WT and IKKε KO mice with MI for 4 days. **d** Cells were isolated from infarcted heart tissues to compare the number of inflammatory macrophages. Data are represented as mean ± SEM. **P* < 0.05; ***P* < 0.01; ****P* < 0.001 (by Student’s *t* test).

**
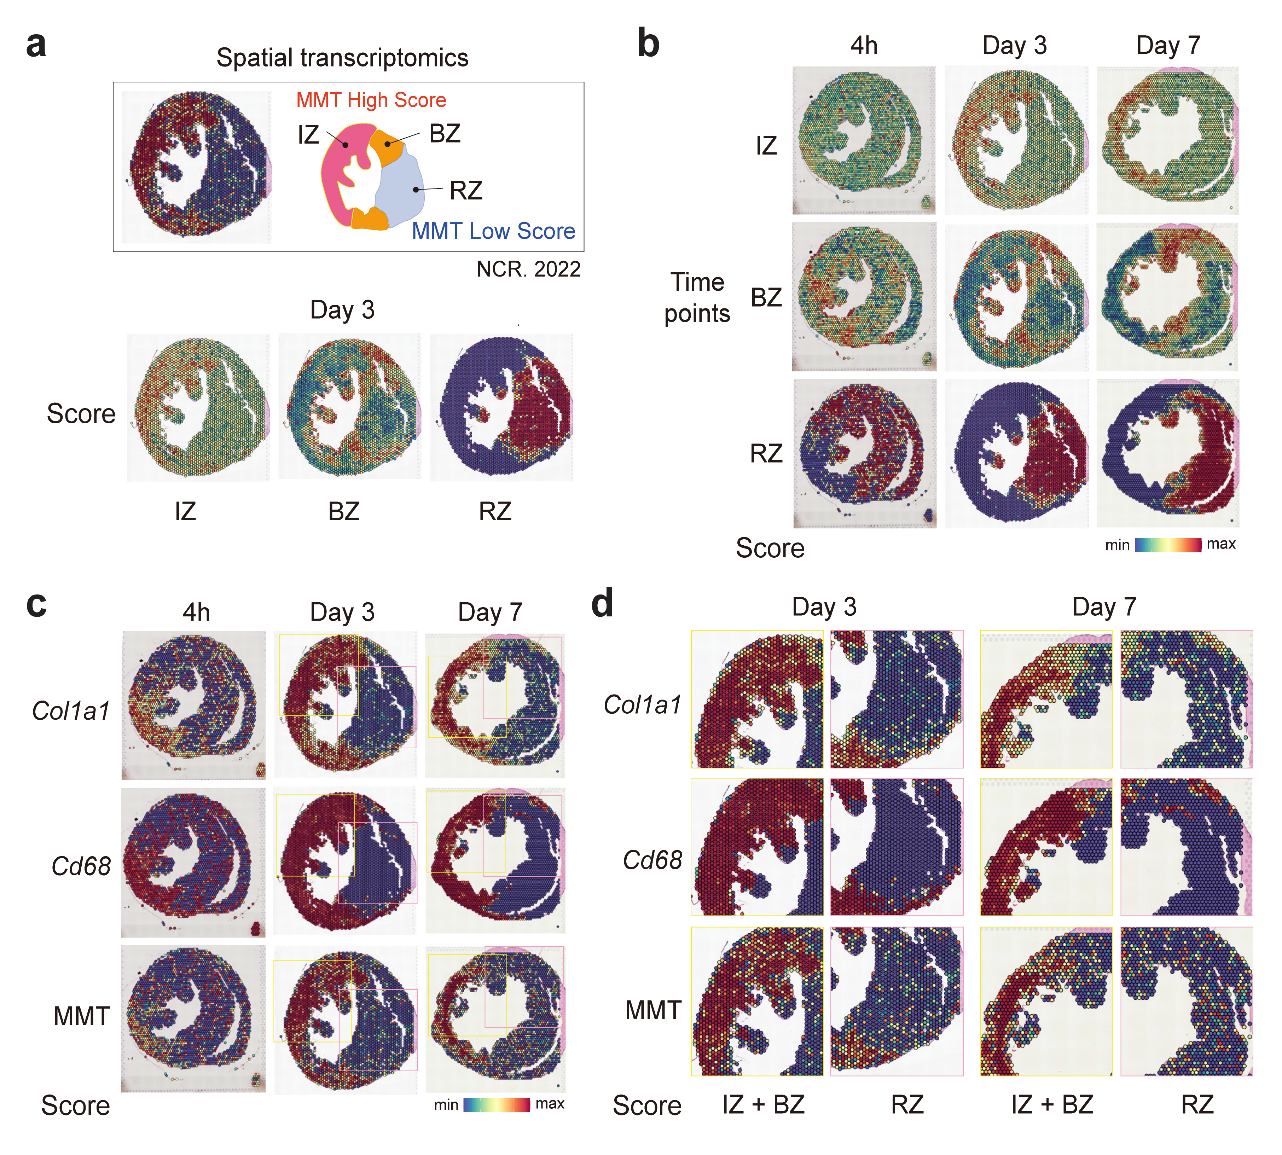
**

**Supplementary Fig 2. The portions of fibroblasts, macrophages, and MMT were visualized with integration of myocardial infarction spatial dataset. a** Overview of spatial transcriptomic analysis across infarct zones. The top-left image illustrates the high and low infarct scores in the different zones: Infarct Zone (IZ), Border Zone (BZ), and Remote Zone (RZ). Below, a time series shows the spatial distribution of gene expression scores on days 3 across the IZ, BZ, and RZ. **b** Time course representation of spatial gene expression within IZ, BZ, and RZ at 4 hours, day 3, and day 7 post-infarction, demonstrating the dynamic changes in the transcriptomic landscape. **c** Detailed spatial transcriptomics for selected genes (*Col1a1*, *Cd68*, and *Cd68*+*Col1a1*+) at 4 hours, day 3, and day 7 post-infarction, providing insights into the cellular and molecular changes within the cardiac tissue during the healing process. **d** High-resolution analysis of *Col1a1* and *Cd68* gene expression along with MMT scores, focusing on the IZ+BZ and RZ at days 3 and 7 post-infarction. This analysis highlights the differential gene expression patterns between the infarct and remote zones.


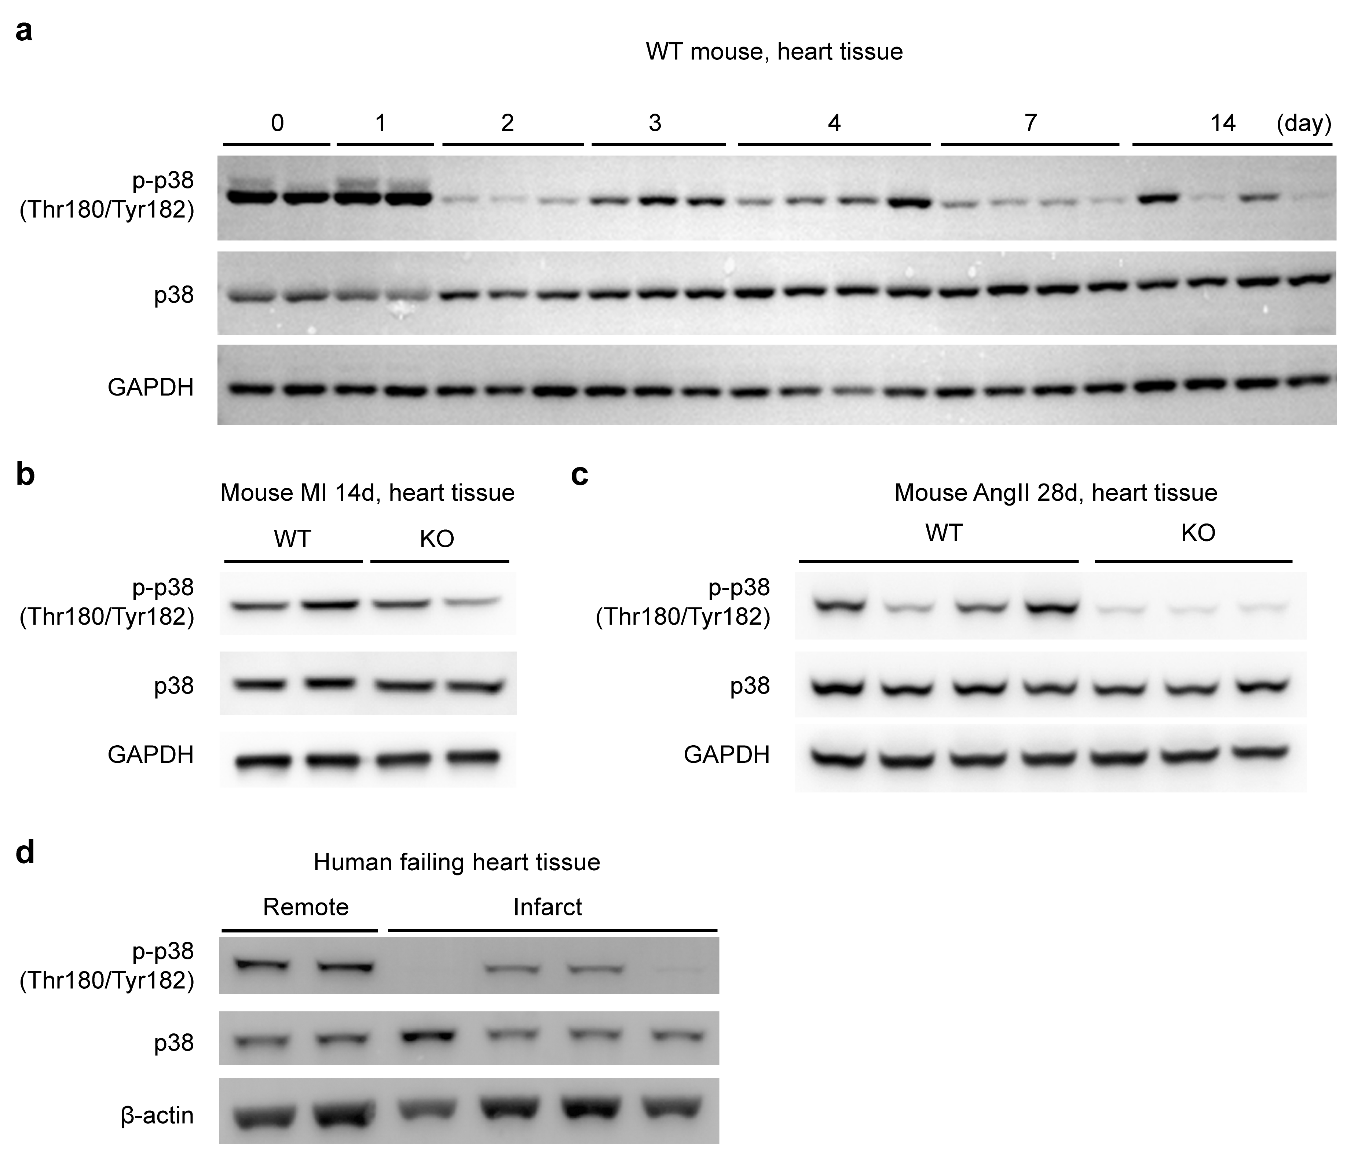


**Supplementary Fig 3. Phosphorylated p38 in damaged heart tissues.** **a** Mouse hearts were collected at day 0, 1, 2, 3, 7, and 14 after myocardial infarction (MI) to assess the protein levels of phosphorylated p38 (p-p38) by Western blot. **b** Protein levels of p-p38 in heart tissues of wild type (WT) and IKKε knockout (KO) mice after 14 days of MI. **c** Protein levels of p-p38 in heart tissues of WT and IKKε KO mice after 28 days after angiotensin II (Ang II) (1500 ng/g/day) infusion. **d** Protein levels of p-p38 in remote zone and infarct zone of human failing heart tissues.


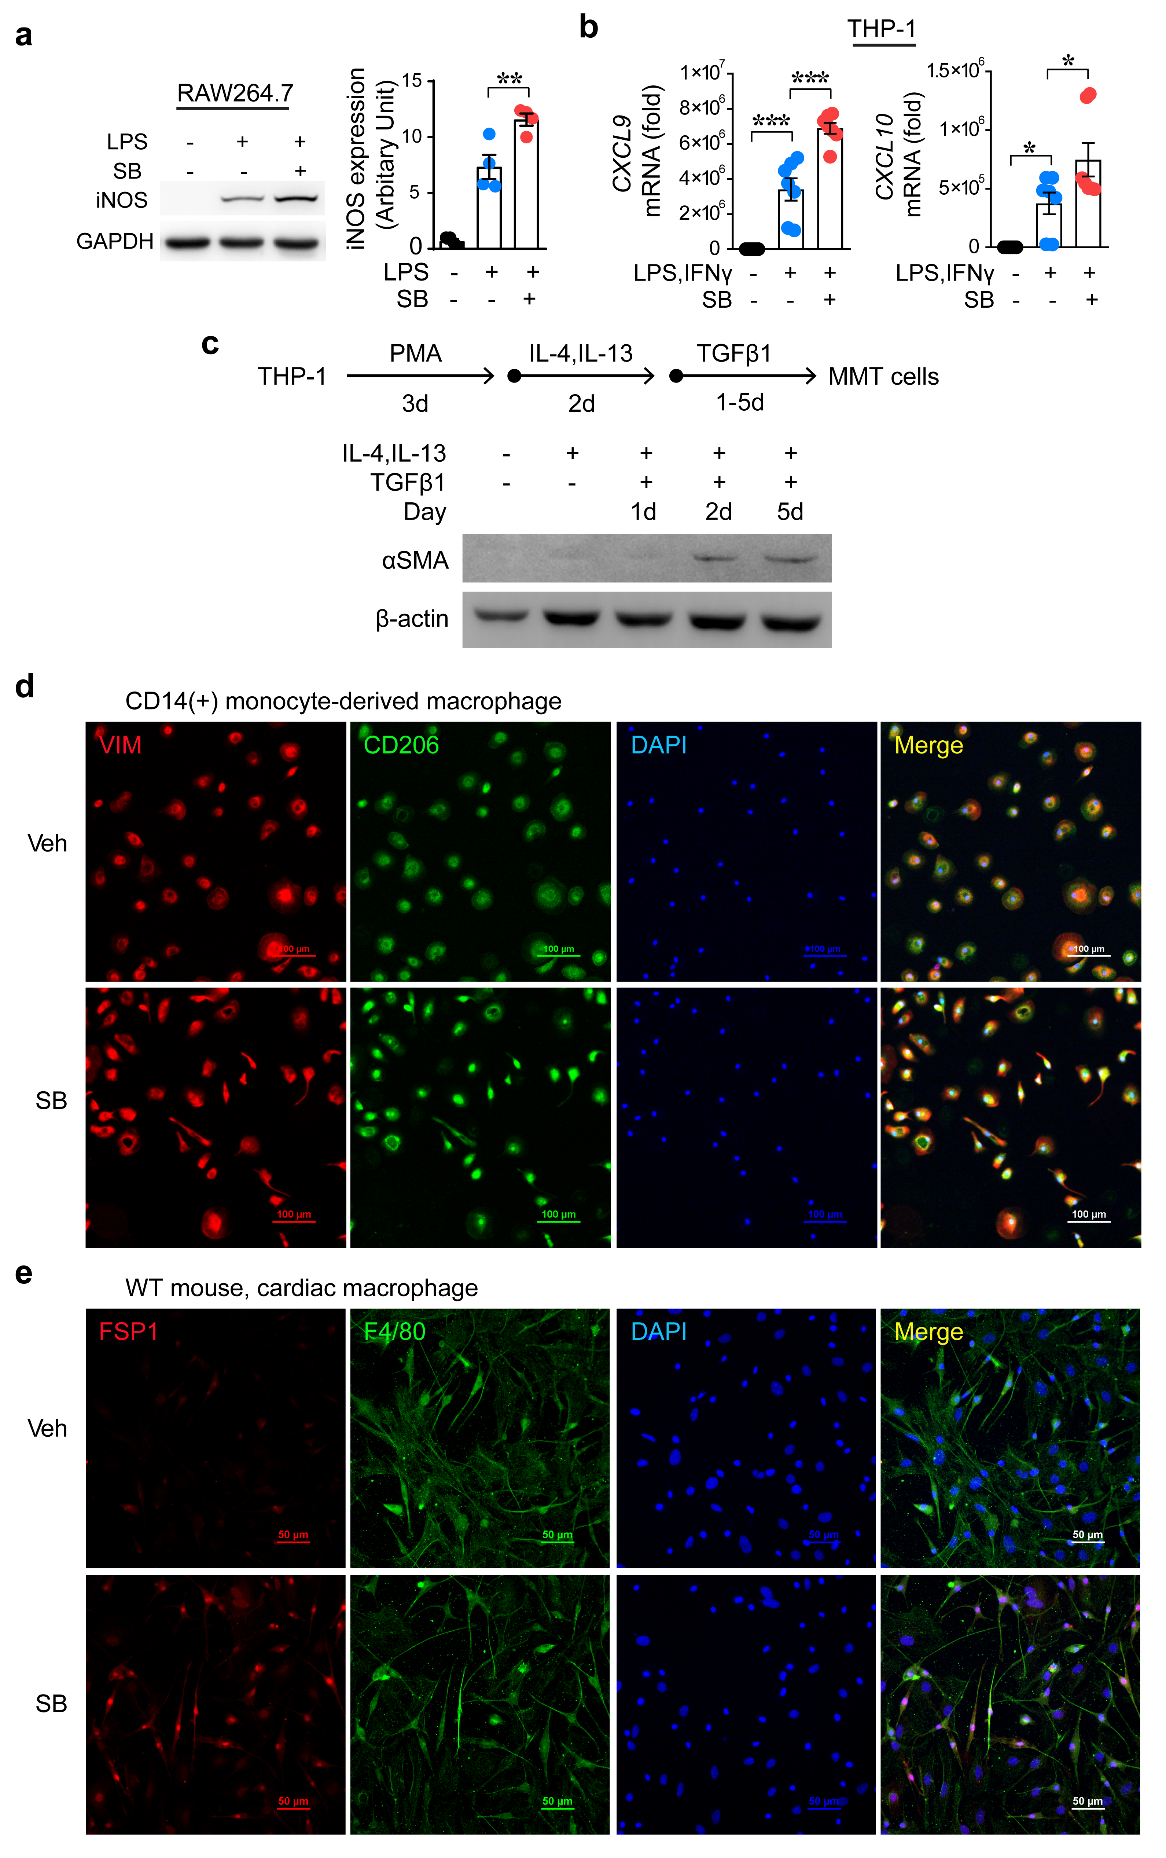


**Supplementary Fig 4. Involvement of p38 activity in macrophage-myofibroblast transition (MMT).** **a** RAW264.7 cells were stimulated with LPS (100 ng/mL) with or without p38 inhibitor SB203580 (SB) (10 μM). Induction of iNOS was assessed by Western blot. Protein expression levels of iNOS were quantified. **b** THP-1 cells were stimulated with LPS (100 ng/mL) and IFNγ (30 ng/mL) with or without SB (10 μM), Inflammatory markers *CXCL9* and *CXCL10* were assessed by real-time PCR. **c** Induction of αSMA in THP-1 macrophages by MMT induction. **d** CD14(+) mononuclear cells were isolated from peripheral blood to induce differentiation into macrophages. Then cells were treated with TGFβ1 (5 ng/mL) with or without SB (10 μM). Immunofluorescence staining showed vimentin (VIM)-expressing CD206(+) anti-inflammatory macrophages. Scale bars: 100μm. **e** Macrophages were isolated from heart tissues at 3 days after myocardial infarction. Then cells were treated with TGFβ1 (5 ng/mL) with or without SB (10 μM). Immunofluorescence staining showed FSP1-expressing F4/80(+) macrophages. Scale bars: 50μm. Data are represented as mean ± SEM. **P* < 0.05; ***P* < 0.01; ****P* < 0.001 (by 1-way ANOVA with Tukey’s multiple comparisons test).


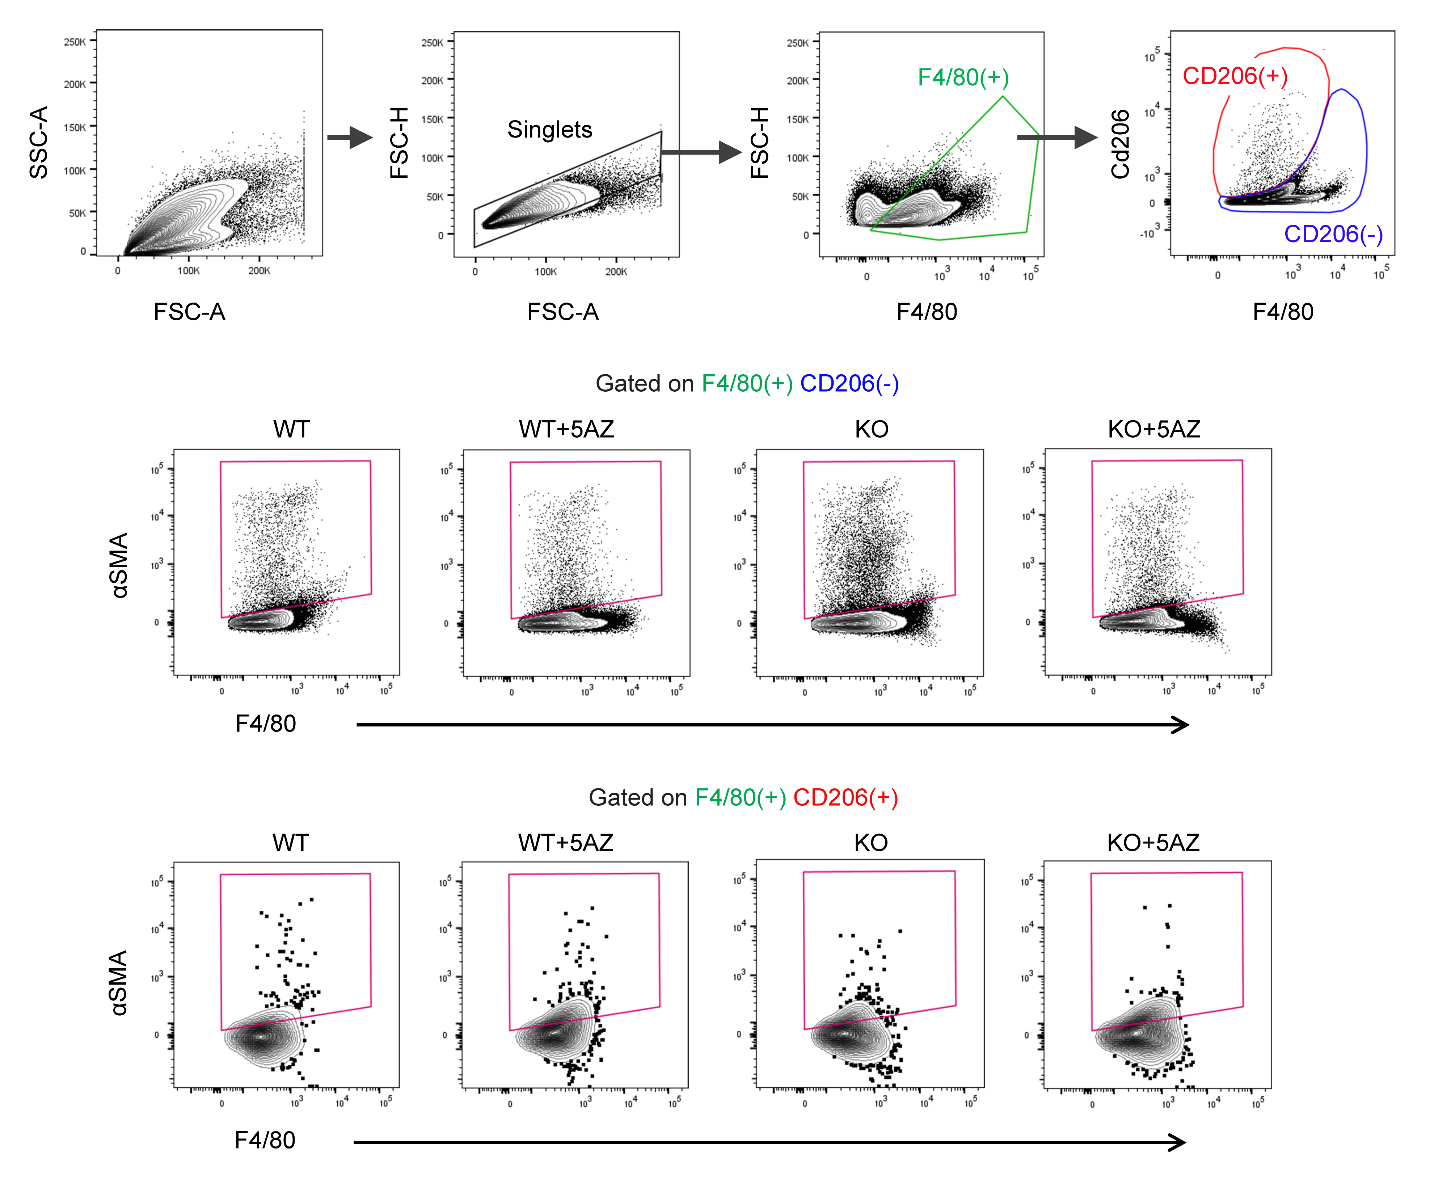


**Supplementary Fig 5. Flow cytometry for analyzing cells isolated from infarcted hearts**. Myocardial infarction was induced and saline or 5-azacytidine (5AZ) (5 μg/g) were peritoneally injected. Representative gating strategy of macrophage populations in the heart was illustrated.

**Supplementary Table 1. Differentially expressed genes for each cell type cluster between IKKε knockout (KO) and wild type mice (WT).** (attached excel file)

**Supplementary Table 2.** **The ratio of phosphorylation in bone marrow-derived macrophages according to LPS and INFγ stimulation.** (attached excel file)

**Supplementary Table 3. List of antibodies.**

| **Antibody** | **Vendor** | **Catalog No.** | **Application** |
| --- | --- | --- | --- |
| PE anti-mouse CD19 | BioLegend | 152407 | Isolation of cardiac cells  for flow cytometry |
| PE anti-mouse Ly6G | BioLegend | 127607 |
| PE anti-mouse NK1.1 | BioLegend | 108707 |
| PE anti-mouse TER119 | BioLegend | 116207 |
| PE anti-mouse THY1.2 | BioLegend | 140307 |
| Alexa fluor 488 anti-alpha smooth muscle actin | abcam | ab184675 | Flow cytometry |
| APC anti-mouse CD206 | Invitrogen | 17-2061-82 |
| APC/CY7 anti-mouse F4/80 | BioLegend | 123117 |
| FITC anti-mouse CD45 | eBioscience | 11-0451-82 |
| Pacific blue ant-mouse Ly6C | BioLegend | 128013 |
| PE anti-mouse CD11b | eBioscience | 12-0112-82 |
| Actin, α-Smooth Muscle | Sigma-Aldrich | A2547 | Western blots,  immunofluorescence staining |
| Fibroblast activation protein, alpha | abcam | ab53066 |
| Phopho-p38 MAPK (Thr180/Tyr182) | CST | 9211 |
| Vimentin | Santa Cruz Biotech | sc-6260 |
| Actin | Sigma-Aldrich | A4700 | Western blots |
| GAPDH | Santa Cruz Biotech | sc-32233 |
| IKK gamma/NEMO | Cell Signaling Technology | 3416 |
| IKKG | abcam | ab137363 |
| IKKα | Santa Cruz Biotech | sc-7218 |
| IKKβ | CST | 2684 |
| NOS | CST | 2977 |
| p38 MAPK | CST | 9212 |
| CD68 | abcam | ab213363 | Immunofluorescence staining |
| COL1A1 | Santa Cruz Biotech | sc-293182 |
| F4/80 | abcam | ab6640 |
| MAC-2 (Galectin-3) | CEDARLANE | CL8942AP |
| Periostin/OSF-2 | R&D Systems | MAB3548 |
| Phospho-ATF2 (Thr71) | CST | 24329 |
| S100A4 (FSP1) | abcam | ab197896 |

**Supplementary Table 4. Primers for real-time PCR.**

| **Gene** | **Primer** |
| --- | --- |
| Human *ACTB* | Forward : ATGCTATCACCTCCCCTGTGTG  Reverse : TTGTTACAGGAAGTCCCTTGCC |
| Mouse *Acta2* | Forward : TCAGGGAGTAATGGTTGGAATG  Reverse : GGTGATGATGCCGTGTTCTA |
| Mouse *Col1a1* | Forward : GAAACCCGAGGTATGCTTGA  Reverse : GGGTCCCTCGACTCCTACAT |
| Mouse *Col3a1* | Forward : GCACAGCAGTCCAACGTAGA  Reverse : TCTCCAAATGGGATCTCTGG |
| Mouse *Col5a1* | Forward : TTCCAGGCCAAACGGTACAT  Reverse : TGAGACACTGTTACAACGATTCCT |
| Mouse *Gapdh* | Forward : GGGTGTGAACCACGAGAAATA  Reverse : GTCATGAGCCCTTCCACAAT |
| Mouse *Nos2* | Forward : GGAATCTTGGAGCGAGTTGT  Reverse : CCTCTTGTCTTTGACCCAGTAG |
| Mouse *Postn* | Forward : TGTGTATCGGACGGCTATCT  Reverse : CTCTGCTGGTTGGATGATTTCT |
| Mouse *S100a4* | Forward : TGAACAAGACAGAGCTCAAGG  Reverse : AGTTGCTCATCACCTTCTGG |

**Supplementary materials and methods**

**Mouse peritonitis model**

Peritonitis was induced in male C57BL/6J and IKKε KO mice (8 weeks of age) with a peritoneal injection of 4% thioglycollate (BD Difco, 211716) in 1 mL volume. On the third day, the mice were intraperitoneally injected with LPS (100 μg/0.3 mL, Sigma-Aldrich, L4391) and sacrificed at 4 hours after LPS injection. The peritoneal macrophages were collected from the peritoneal cavity by washing with PBS, and adherent macrophages were assessed by further analyses.

**Mouse non-ischemic heart failure model using AngiotensinⅡ infusion**

Male C57BL/6J and IKKε KO mice (14 weeks of age) were anesthetized with an intramuscular injection of ketamine (50 mg/kg) and xylazine (5 mg/kg). The osmotic mini pump (Alzet 1004) was implanted for AngiotensinⅡ (1500 ng/g/day, Sigma-Aldrich, A9525) infusion under the skin for 4 weeks. Mice in the control group were infused with saline using an Alzet 1004 pump.

**Cell lines**

The RAW 264.7 murine monocyte/macrophage cell line, which was purchased from the Korean Cell Line Bank (Seoul, Korea), was cultured in Dulbecco’s Modified Eagle’s Medium (Gibco, 11885-084) supplemented with 10% fetal bovine serum (FBS). Human monocytic THP-1 cells, purchased from the Korean Cell Line Bank, were cultured in RPMI 1640 (Welgene, LM-011-01) supplemented with 10% FBS and 1% penicillin-streptomycin. THP-1 cells were treated with Phorbol 12-myristate 13-acetate (PMA) (250 nM, Sigma-Aldrich, 8139) for 72 hours to differentiate the THP-1 cells into macrophages.
