# Supplementary material for: IKKε-deficient macrophages impede cardiac repair after myocardial infarction by enhancing macrophage-myofibroblast transition
Source: Research Square preprint supplement (doi:10.21203/rs.3.rs-3899594/v1), 2024-03-01
Supplement: Supplementary file 3 [file a75a3d98a4591540c23e53f9.xlsx]

## Sheet: Supplemental Table 2
Antibody Name	Fold change	Raw data		Antibody Name	Fold change	Raw data			Antibody Name	Fold change	Raw data		Antibody Name	Fold change	Raw data
	KO10/WT10	WT10	KO10		KO10/WT10	WT10	KO10			KO60/WT60	WT60	KO60		KO60/WT60	WT60	KO60
DNA-PK (Ab-2056)	3.00415	553.5	1651.5	HDAC1 (Ab-421)	0.0726005	33727.5	2432		BAD (Phospho-Ser155)	3.49964	869	3323	HDAC1 (Ab-421)	0.128932	14700.5	2071
Pyk2 (Ab-580)	2.84031	1042	2939.5	P90RSK (Ab-573)	0.292727	2445.5	711		eIF4B (Phospho-Ser422)	3.43036	639.5	2397	VE-Cadherin (Phospho-Tyr731)	0.477173	8286.5	4320.5
CK2-b (Ab-209)	2.79884	704	1957	BLNK (Ab-96)	0.390133	4346	1684		BCL-XL (Phospho-Thr47)	3.24917	482.5	1713	HSP90B (Phospho-Ser226)	0.498829	5321.5	2900.5
Catenin beta (Ab-33)	2.58711	528.5	1358	B-RAF (Phospho-Ser446)	0.392427	1719	670		Estrogen Receptor-alpha (Phospho-Ser106)	2.84362	779.5	2422	CK1-A (Phospho-Thr321)	0.55379	3289.5	1990.5
eIF4B (Phospho-Ser422)	2.14629	679.5	1448.5	LYN (Ab-507)	0.407925	3492.5	1415		Fos (Phospho-Thr232)	2.62438	774	2219.5	AFX/FOXO4 (Phospho-Ser197)	0.564405	1484.5	915.5
Fos (Ab-232)	1.97045	803.5	1572.5	GSK3 alpha/beta (Ab-216/279)	0.420987	1340.5	560.5		BLNK (Ab-96)	2.33814	1336.5	3414.5	Tyrosine Hydroxylase (Ab-31)	0.573723	1391	872
p53 (Phospho-Ser366)	1.93045	750	1438	Abl1 (Ab-204)	0.479727	3431.5	1635		Merlin (Ab-10)	2.33646	665.5	1699	VEGFR2 (Ab-951)	0.593215	8513	5518
BCL-2 (Ab-70)	1.86517	569.5	1055	PDK1 (Phospho-Ser241)	0.504517	1606.5	805		MARCKS (Ab-158)	2.23092	1070.5	2609.5	JunB (Phospho-Ser259)	0.593276	1158.5	751
NFkB-p105/p50 (Phospho-Ser932)	1.84243	732	1339.5	BRCA1 (Phospho-Ser1423)	0.528423	1721.5	903.5		IKK-gamma (Phospho-Ser31)	2.22007	488.5	1185	BRCA1 (Phospho-Ser1423)	0.601204	2444	1605.5
NFkB-p65 (Phospho-Thr505)	1.81657	899	1622	Gab2 (Ab-623)	0.54922	1319	719.5		Filamin A (Ab-2152)	2.1866	751.5	1795.5	FGFR1 (Phospho-Tyr766)	0.605974	954.5	632
Smad1 (Ab-187)	1.77547	568.5	1002.5	CD4 (Ab-433)	0.572007	1684.5	957		Catenin beta (Ab-489)	2.16617	501.5	1187	HNF4 alpha (Phospho-Ser313)	0.611035	1515	1011.5
Pyk2 (Ab-881)	1.69707	2181.5	3677	ACC1 (Phospho-Ser79)	0.572857	1334	759		HDAC5 (Ab-259)	2.07622	564	1279.5	Cyclin B1 (Ab-126)	0.625669	3268.5	2234.5
TFII-I (Phospho-Tyr248)	1.60509	1221	1946.5	Chk2 (Phospho-Thr387)	0.588714	1236.5	723		Raf1 (Ab-341)	2.07575	746	1692	EGFR (Phospho-Tyr869)	0.629773	1436.5	988.5
SP1 (Phospho-Thr739)	1.60025	772	1227	Paxillin (Phospho-Tyr118)	0.593126	1229	724		GluR1 (Phospho-Ser863)	2.06777	586	1324	Caspase 9 (Ab-125)	0.631365	1041.5	718.5
KIT (Phospho-Tyr721)	1.58745	3189	5028	4E-BP1 (Ab-65)	0.599879	7411	4415.5		Rb (Ab-811)	2.06022	774.5	1743.5	SMC1 (Phospho-Ser957)	0.632034	856.5	591.5
Gab2 (Ab-159)	1.57596	659	1031.5	IGF1R (Phospho-Tyr1165/1166)	0.600626	1274	760		TLK1 (Ab-764)	2.01135	2425	5329.5	Integrin beta-3 (Phospho-Tyr773)	0.636314	1800	1251.5
Smad2 (Ab-255)	1.5438	1403.5	2152	Merlin (Ab-10)	0.609412	1479.5	895.5		BLNK (Phospho-Tyr96)	1.98286	1263.5	2737.5	PDK1 (Phospho-Ser241)	0.63802	1662.5	1159
BTK (Ab-223)	1.52657	710	1076.5	B-RAF (Ab-598)	0.609501	1753.5	1061.5		Cyclin D3 (Phospho-Thr283)	1.94756	433.5	922.5	Paxillin (Phospho-Tyr118)	0.643291	1016.5	714.5
STAT1 (Phospho-Tyr701)	1.51927	894	1349	Integrin beta-1 (Ab-788)	0.617696	1000	613.5		PLCG2 (Phospho-Tyr753)	1.90377	767	1595.5	Tau (Phospho-Thr212)	0.645863	1383	976
Keratin 8 (Phospho-Ser431)	1.5022	1062	1584.5	Chk1 (Phospho-Ser296)	0.618077	893.5	548.5		Estrogen Receptor-alpha (Phospho-Ser104)	1.88862	1516.5	3129.5	ALK (Phospho-Tyr1604)	0.646856	3376.5	2386.5
CPI17 alpha (Ab-38)	1.48992	594	879	Shc (Ab-349)	0.628939	6750	4216.5		Caspase 6 (Ab-Ser257)	1.88241	774	1592	GATA1 (Phospho-Ser310)	0.654846	1726	1235
NFkB-p65 (Ab-281)	1.48683	934.5	1380	LYN (Phospho-Tyr507)	0.629102	1458	911		eNOS (Ab-615)	1.88071	491	1009	FLT3 (Phospho-Tyr842)	0.655728	2234.5	1601
B-RAF (Ab-601)	1.48219	538	792	Tau (Phospho-Ser235)	0.641456	2350.5	1497.5		PAK1/2 (Phospho-Ser199)	1.85374	411.5	833.5	PKR (Phospho-Thr451)	0.655876	1177	843.5
Caspase 9 (Ab-153)	1.46503	773.5	1125.5	ASK1 (Ab-83)	0.643227	875	559		KIT (Phospho-Tyr703)	1.82535	454	905.5	ASK1 (Phospho-Ser83)	0.656535	1804.5	1294.5
NFkB-p65 (Phospho-Thr254)	1.44738	684.5	984	MSK1 (Ab-360)	0.657387	4013.5	2620.5		Keratin 8 (Phospho-Ser431)	1.8226	1234	2457.5	Cyclin D1 (Ab-286)	0.663714	3848.5	2791
IL7R/CD127 (Phospho-Tyr449)	1.44573	1673.5	2403	GATA1 (Phospho-Ser142)	0.66299	1202	791.5		ATPase (Phospho-Ser16)	1.82196	489	973.5	NFkB-p105/p50 (Ab-927)	0.664456	20701	15029.5
LCK (Ab-504)	1.43557	829	1182	MEK1 (Ab-298)	0.666264	1082	716		Tyrosine Hydroxylase (Ab-40)	1.79887	740.5	1455.5	Ephrin B1/B2/B3 (Phospho-Tyr324)	0.667915	3460.5	2525.5
Interferon-alpha/beta receptor alpha chain (Phospho-Tyr466)	1.42788	467.5	663	MSK1 (Phospho-Ser212)	0.668832	1121.5	745		Tau (Phospho-Ser235)	1.78062	662	1288	NFkB-p100/p52 (Phospho-Ser865)	0.673305	2115	1556
BLNK (Phospho-Tyr96)	1.42681	1583.5	2244	IKK-alpha/beta (Ab-176/177)	0.670996	3645.5	2429.5		Smad1 (Phospho-Ser465)	1.76444	513.5	990	JunB (Phospho-Ser79)	0.678937	1334.5	990
DYN1 (Ab-774)	1.42531	12957.5	18343	FAK (Phospho-Ser910)	0.671052	961	640.5		HDAC2 (Phospho-Ser394)	1.76089	546.5	1051.5	Elk1 (Phospho-Thr417)	0.68074	1274.5	948
DNA-PK (Ab-2638)	1.41593	776.5	1092	Met (Phospho-Tyr1356)	0.680522	8701	5881		FRS2 (Phospho-Tyr436)	1.76048	648	1246.5	HER2 (Phospho-Tyr877)	0.687337	972	730
CDC25B (Ab-353)	1.41561	433.5	609.5	CDC25C (Phospho-Thr48)	0.683843	997.5	677.5		MDM2 (Phospho-Ser166)	1.75841	890	1710	KIT (Phospho-Tyr721)	0.687555	5027.5	3777
Smad3 (Phospho-Ser213)	1.415	1411	1983	MEK1 (Phospho-Thr286)	0.688861	1827	1250		CXCR4 (Phospho-Ser339)	1.74843	536	1024	IKK-gamma (Ab-31)	0.690958	2632.5	1987.5
FGFR1 (Ab-154)	1.41463	737	1035.5	Smad2 (Ab-250)	0.690424	743	509.5		BCL-2 (Phospho-Thr69)	1.73969	832.5	1582.5	Connexin 43 (Phospho-Ser367)	0.692655	1133	857.5
Kv1.3/KCNA3 (Phospho-Tyr135)	1.40178	2930.5	4080	MAP3K8/COT (Ab-400)	0.692369	944.5	649.5		LCK (Phospho-Ser59)	1.71549	689	1291.5	Tau (Ab-262)	0.693482	1081.5	819.5
CD5 (Phospho-Tyr453)	1.39395	1430.5	1980.5	FKHR (Ab-256)	0.692977	1219	839		STAT1 (Phospho-Ser727)	1.71028	571.5	1068	DARPP-32 (Ab-34)	0.693529	2485.5	1883.5
BTK (Phospho-Tyr550)	1.39328	1013.5	1402.5	HSL (Ab-552/563)	0.700641	1044	726.5		ATPase (Ab-16)	1.70608	548.5	1022.5	IRS-1 (Ab-312)	0.695747	1186.5	902
IL-4R/CD124 (Ab-497)	1.39061	902.5	1246.5	IR (Phospho-Tyr1361)	0.701412	2774	1932.5		Fyn (Phospho-Tyr530)	1.70178	459	853.5	EPB41 (Ab-418/660)	0.697189	858.5	654
TGFBR2 (Ab-250)	1.3856	2205	3034.5	PKC zeta (Ab-560)	0.709704	706.5	498		p53 (Ab-315)	1.70162	2082.5	3872	AKT1/2/3 (Ab-315)	0.700062	904	691.5
RSK1/2/3/4 (Ab-221/227/218/232)	1.38504	989	1360.5	CD32 (FcgammaRIIb)(Ab-292)	0.712707	1557.5	1102.5		Catenin beta (Phospho-Ser37)	1.69156	695.5	1285.5	Catenin beta (Phospho-Ser33)	0.700937	944	723
Rb (Phospho-Thr821)	1.38412	656.5	902.5	CaMK2A (Ab-286)	0.715935	1666.5	1185		PKA-R2B (Phospho-Ser113)	1.69142	691.5	1278	Synuclein alpha (Ab-133)	0.708859	1100	852
PKR (Ab-451)	1.3725	687	936.5	LIMK1/2 (Ab-508/505)	0.725569	2563	1847		BTK (Phospho-Tyr550)	1.68698	743.5	1370.5	HER2 (Phospho-Tyr1221/Tyr1222)	0.712671	1071	834
14-3-3 zeta/delta (Phospho-Thr232)	1.36507	1061	1438.5	BIM (Phospho-Ser69/65)	0.727349	1196	864		IKK-gamma (Phospho-Ser85)	1.67845	641.5	1176.5	JAK1 (Ab-1022)	0.714407	1119	873.5
IKK-gamma (Phospho-Ser85)	1.36134	622	841	Actin Pan (a/b/g)(Ab-55/53)	0.735481	948	692.5		CREB (Ab-121)	1.65777	535.5	970	Progesterone Receptor (Ab-190)	0.716338	798.5	625
Cyclin E1 (Ab-77)	1.35981	8497.5	11476.5	VEGFR2 (Ab-951)	0.738027	7197	5275.5		FAK (Ab-407)	1.64081	490	878.5	VEGFR2 (Phospho-Tyr1054)	0.718021	1819.5	1427.5
Progesterone Receptor (Phospho-Ser190)	1.35364	900	1210	MEF2C (Phospho-Ser396)	0.751449	889	663.5		STAT2 (Ab-690)	1.639	657.5	1177.5	Abl1 (Ab-204)	0.719563	2842	2234.5
SHP-2 (Ab-542)	1.34915	1078	1444.5	BIM (Ab-69/65)	0.755465	751	563.5		PDGFR alpha (Phospho-Tyr849)	1.63171	638	1137.5	TFII-I (Phospho-Tyr248)	0.721293	1196.5	943
Progesterone Receptor (Ab-190)	1.34744	538	720	Androgen Receptor (Ab-650)	0.75608	927.5	696.5		ACC1 (Phospho-Ser80)	1.62251	519.5	921	ALK (Phospho-Tyr1507)	0.72448	2790.5	2209
NFkB-p65 (Phospho-Ser536)	1.33754	785.5	1043.5	Smad1 (Ab-465)	0.756718	634	476.5		HSL (Phospho-Ser552/563)	1.61186	456.5	804	Estrogen Receptor-alpha (Phospho-Ser118)	0.726057	1471	1167
XIAP (Ab-87)	1.33671	847	1124.5	NFkB-p65 (Phospho-Thr435)	0.758679	886.5	668		BAD (Phospho-Ser91/128)	1.60582	676.5	1187	STAT6 (Ab-641)	0.726682	903	717
4E-BP1 (Ab-45)	1.32785	1872.5	2469.5	Cyclin D3 (Phospho-Thr283)	0.759063	1024	772		FOXO1/3/4-pan (Phospho-Thr24/32)	1.60015	717.5	1254.5	MSK1 (Phospho-Ser376)	0.727805	820.5	652.5
NFkB-p100/p52 (Phospho-Ser872)	1.32658	1036	1365	PTEN (Phospho-Ser380/Thr382/Thr383)	0.763184	1750	1326.5		14-3-3 beta/zeta (Ab-184/186)	1.58607	811	1405.5	GAP43 (Phospho-Ser41)	0.729263	1139.5	908
IL-2RA/CD25 (Ab-268)	1.32224	656	861.5	LKB1 (Phospho-Thr189)	0.764633	927	704		Ezrin (Ab-566)	1.58052	1846	3188	Dok-2 (Ab-299)	0.729422	1406.5	1121
STAM2 (Phospho-Tyr192)	1.31822	2881	3772	SLP-76 (Phospho-Tyr128)	0.764983	843	640.5		MAPKAPK2 (Phospho-Thr334)	1.57646	614.5	1058.5	Tau (Ab-396)	0.730869	1780	1421.5
BCL-6 (Ab-333)	1.31687	846	1106.5	EGFR (Phospho-Tyr869)	0.766689	1067	812.5		4E-BP1 (Phospho-Ser65)	1.57621	599.5	1032.5	HER2 (Phospho-Tyr1248)	0.731036	981.5	784
Caspase 9 (Ab-196)	1.31524	5081.5	6638	p53 (Ab-15)	0.766876	600	457		Smad3 (Phospho-Ser208)	1.57451	583	1003	4E-BP1 (Ab-65)	0.735799	4043	3250.5
EGFR (Ab-1172)	1.3069	2251.5	2922.5	VEGFR2 (Phospho-Tyr1059)	0.76924	553	422.5		p130Cas (Phospho-Tyr410)	1.57407	582	1001	DAB1 (Phospho-Tyr220)	0.735914	1314.5	1057
Smad3 (Ab-425)	1.30374	771.5	999	14-3-3 beta/zeta (Ab-184/186)	0.770274	964	737.5		RyR2 (Ab-2808)	1.55555	499.5	849	MKK6/MAP2K6 (Phospho-Ser207)	0.739454	1153.5	932
Connexin 43 (Phospho-Ser367)	1.30226	881	1139.5	MEF2A (Ab-319)	0.771215	1134.5	869		c-Jun (Ab-93)	1.55368	640	1086.5	Rel (Ab-503)	0.740584	836	676.5
p38 MAPK (Ab-180)	1.29962	521	672.5	FGFR1 (Phospho-Tyr654)	0.774968	1789	1377		Met (Phospho-Tyr1003)	1.55162	881.5	1494.5	Elk1 (Ab-389)	0.740668	1397.5	1131
Zap-70 (Phospho-Tyr319)	1.29406	1130.5	1453	Tuberin/TSC2 (Phospho-Ser939)	0.775095	706	543.5		FLT3 (Phospho-Tyr969)	1.5448	2224	3754	MKK6/MAP2K6 (Ab-207)	0.741646	1996	1617.5
SLP-76 (Ab-128)	1.29019	732	938	eIF4G (Phospho-Ser1108)	0.776595	920.5	710		GATA1 (Ab-310)	1.54335	660	1113	VASP (Phospho-Ser157)	0.74451	1155.5	940
Claudin 7 (Phospho-Tyr210)	1.28969	1641	2102	MARCKS (Phospho-Ser163)	0.781698	919	713.5		MSK1 (Phospho-Ser360)	1.54171	1247.5	2101.5	Smad2 (Ab-220)	0.745494	1159.5	944.5
TLK1 (Ab-764)	1.27854	3865	4908	HSP90B (Phospho-Ser254)	0.788635	1040.5	815		B-RAF (Ab-601)	1.53875	522.5	878.5	PAK1 (Phospho-Ser204)	0.746651	1319.5	1076.5
p53 (Phospho-Ser315)	1.27571	1151.5	1459	Cyclin D1 (Phospho-Thr286)	0.788796	1364.5	1069		eNOS (Phospho-Ser615)	1.52372	667	1110.5	ACC1 (Ab-79)	0.748351	1220.5	998
VASP (Phospho-Ser238)	1.27467	1022.5	1294.5	Paxillin (Ab-118)	0.789215	576	451.5		CDK7 (Phospho-Thr170)	1.52232	762	1267.5	p53 (Phospho-Ser37)	0.748911	1431	1171
GSK3 alpha/beta (Phospho-Tyr216/279)	1.27199	843	1065	FGFR1 (Ab-766)	0.789302	865.5	678.5		Merlin (Phospho-Ser10)	1.51386	1104.5	1827	P70S6K (Ab-371)	0.750593	1156.5	948.5
MKK4/SEK1 (Phospho-Ser80)	1.2711	1063	1342	HDAC5 (Ab-259)	0.789569	1443.5	1132		AKT1 (Phospho-Thr308)	1.50588	737.5	1213.5	CaMK2A (Ab-286)	0.75278	1451	1193.5
Myc (Ab-358)	1.26955	7347	9264	IKK-beta (Phospho-Tyr188)	0.790913	823	646.5		Keratin 18 (Ab-33)	1.4985	546	894	c-PLA2 (Phospho-Ser505)	0.753123	1095.5	901.5
EEF2 (Ab-56)	1.26858	4102.5	5169	ATPase (Phospho-Ser16)	0.791454	984	773.5		AKT1 (Ab-72)	1.48184	4087	6617.5	PP2A-alpha (Ab-307)	0.753379	1479	1217.5
FLT3 (Phospho-Tyr842)	1.26497	1685	2117	Rb-like-2 (RBL2)(Ab-952)	0.792267	518.5	408		BCL-2 (Phospho-Ser87)	1.47834	776	1253.5	CK1-A/A2 (Phospho-Tyr294)	0.755813	1381	1140.5
Elk1 (Phospho-Ser383)	1.26455	1279.5	1607	Calmodulin (Ab-79/81)	0.794243	672.5	530.5		Smad3 (Ab-425)	1.47527	710	1144.5	Myc (Phospho-Thr358)	0.756432	1579.5	1305.5
P95/NBS1 (Phospho-Ser343)	1.26083	826.5	1035	NFkB-p65 (Phospho-Ser311)	0.794249	1570	1238.5		FER (Ab-402)	1.47351	1292.5	2081	EGFR (Phospho-Thr678)	0.757752	854.5	707.5
FAK (Phospho-Tyr925)	1.2602	763	955	FER (Ab-402)	0.795396	2128.5	1681.5		Trk A (Phospho-Tyr791)	1.47345	520.5	838	Histone H3.1 (Phospho-Ser10)	0.757961	1298	1075
NFkB-p105/p50 (Ab-927)	1.25936	11112	13899	MKK7/MAP2K7 (Phospho-Thr275)	0.796363	1227	970.5		PAK1/2/3 (Ab-423/402/421)	1.47006	5142	8259.5	NFkB-p65 (Phospho-Ser276)	0.761434	1553.5	1292.5
PPAR-gamma (Ab-112)	1.25844	10104.5	12629.5	KIT (Phospho-Tyr703)	0.797101	1058.5	838		MDM4 (Phospho-Ser367)	1.46696	656	1051.5	Rb (Ab-780)	0.763368	1618.5	1350
ASK1 (Phospho-Ser83)	1.25755	1012	1264	WWOX (Phospho-Tyr33)	0.797647	1595.5	1264		Cyclin B1 (Phospho-Ser126)	1.45464	615	977.5	Met (Phospho-Tyr1356)	0.764308	6111	5103.5
HER3/ErbB3 (Phospho-Tyr1289)	1.25735	631	788	NMDAR1 (Ab-897)	0.797817	513	406.5		ATP1A1/Na+K+ ATPase1 (Ab-23)	1.45183	1085.5	1722	Met (Ab-1234)	0.765558	1079.5	903
GRK1 (Phospho-Ser21)	1.25489	927.5	1156	CaMK2-beta/gamma/delta (Phospho-Thr287)	0.798029	730.5	579		p130Cas (Ab-410)	1.45159	633	1004	Tau (Ab-205)	0.766835	1443.5	1209.5
GluR1 (Ab-849)	1.2535	8453.5	10524.5	Chk1 (Ab-280)	0.799252	599	475.5		EGFR (Phospho-Tyr1172)	1.4504	796	1261.5	VAV2 (Phospho-Tyr142)	0.767992	1330.5	1116.5
c-Jun (Phospho-Thr239)	1.25296	585	728						CaMK2 alpha/beta/delta (Phospho-Thr305)	1.44678	569	899.5	Chk2 (Phospho-Thr387)	0.770083	873.5	735
EGFR (Ab-1069)	1.25208	486.5	605						Abl1 (Phospho-Tyr412)	1.44588	660.5	1043.5	B-RAF (Phospho-Ser446)	0.773077	1069	903
									Smad2/3 (Ab-8)	1.43849	790.5	1242.5	Chk2 (Ab-387)	0.774629	2096.5	1774.5
									EEF2 (Phospho-Thr56)	1.43299	821	1285.5	IKK-alpha/beta (Ab-180/181)	0.776339	1104	936.5
									FOXO1A/3A (Phospho-Ser322/325)	1.42742	858.5	1339	PI3-kinase p85-subunit alpha/gamma (Phospho-Tyr467/Tyr199)	0.777661	1713.5	1456
									DYN1 (Ab-774)	1.42457	11352.5	17671	NFkB-p65 (Phospho-Thr435)	0.779502	951	810
									DNA-PK (Ab-2638)	1.42448	597.5	930	c-Jun (Ab-239)	0.780007	1191.5	1015.5
									Smad2 (Phospho-Thr220)	1.42267	633	984	AKT1 (Phospho-Thr450)	0.780397	1290	1100
									FKHR/FOXO1A (Phospho-Ser329)	1.42101	735.5	1142	FAK (Ab-397)	0.782329	1078	921.5
									AXL (Phospho-Tyr691)	1.41943	520	806.5	ATP1A1/Na+K+ ATPase1 (Phospho-Ser23)	0.782495	1403.5	1200
									Cyclin B1 (Ab-147)	1.41632	431	667	Raf1 (Phospho-Ser43)	0.782505	907	775.5
									MEF2C (Ab-396)	1.41537	639.5	989	GABA-RB (Phospho-Ser434)	0.78306	658	563
									PAK2 (Ab-192)	1.41343	563	869.5	Raf1 (Phospho-Ser259)	0.783154	1310	1121
									ACC1 (Phospho-Ser79)	1.41226	429	662	p53 (Phospho-Ser392)	0.783174	1074.5	919.5
									NFkB-p105/p50 (Phospho-Ser927)	1.41219	720	1111	DAB1 (Ab-220)	0.78324	863.5	739
									PLD1 (Phospho-Ser561)	1.40795	872	1341.5	p38 MAPK (Phospho-Tyr182)	0.784382	937.5	803.5
									ALK (Ab-1604)	1.40738	873	1342.5	EGFR (Ab-1172)	0.784824	3334.5	2859.5
									EGFR (Phospho-Tyr1069)	1.40432	805.5	1236	BCL-2 (Phospho-Thr56)	0.785126	1259.5	1080.5
									KIT (Phospho-Tyr936)	1.40209	960.5	1471.5	BIM (Phospho-Ser69/65)	0.785973	988	848.5
									JAK2 (Phospho-Tyr221)	1.4006	872	1334.5	c-Jun (Phospho-Thr91)	0.786895	1177	1012
									Caspase 3 (Phospho-Ser150)	1.39838	670.5	1024.5	HDAC8 (Phospho-Ser39)	0.787721	1159.5	998
									IL-13R/CD213a1 (Phospho-Tyr405)	1.39659	4461	6807.5	Cortactin (Phospho-Tyr421)	0.788901	1880.5	1621
									VAV1 (Ab-160)	1.39405	861	1311.5	NFkB-p65 (Ab-435)	0.789041	1168	1007
									SRF (Ab-99)	1.38865	1587	2408	DARPP-32 (Phospho-Thr34)	0.789188	759	654.5
									Pyk2 (Ab-881)	1.38463	2550	3858	FAK (Ab-910)	0.792951	4361	3778.5
									LCK (Phospho-Tyr504)	1.38366	884	1336.5	IRS-1 (Phospho-Ser636)	0.793476	1485	1287.5
									P90RSK (Ab-573)	1.38298	830.5	1255	PKC zeta (Phospho-Thr560)	0.793529	929	805.5
									p38 MAPK (Ab-322)	1.37499	520.5	782	SYK (Ab-348)	0.793874	1165.5	1011
									Gab2 (Phospho-Tyr643)	1.37166	2217.5	3323.5	Shc (Ab-349)	0.79418	5093.5	4420
									IL3RB (Phospho-Tyr593)	1.37039	953	1427	CREB (Ab-142)	0.795519	726.5	631.5
									MKP-1 (Phospho-Ser359)	1.36255	603.5	898.5	PTEN (Phospho-Ser380)	0.795721	1409.5	1225.5
									AMPK beta1 (Phospho-Ser182)	1.3592	842	1250.5	Dok-1 (Ab-362)	0.796085	826	718.5
									AKT1 (Phospho-Ser124)	1.35627	471	698	BCL-XL (Phospho-Ser62)	0.796264	1300.5	1131.5
									MER/SKY (Phospho-Tyr749/Tyr681)	1.35453	889.5	1316.5	eIF2A (Ab-51)	0.796665	1177.5	1025
									Stathmin 1 (Phospho-Ser24)	1.35423	727.5	1076.5	STAT6 (Phospho-Thr645)	0.797129	1794.5	1563
									FOXO1/3/4-pan (Ab-24/32)	1.3527	922.5	1363.5	BCL-2 (Phospho-Ser70)	0.798905	1090	951.5
